# Supplementary material for: Regulating the upconversion luminescence properties of Tm3+/Yb3+-codoped ZrScW2PO12 microparticles with a negative thermal expansion effect through thermal stimulation for optical thermometry
Source: Royal Society of Chemistry journal article supplement (doi:10.1039/d3dt04110g), 2024-01-01
Supplement: d3dt04110g1.pdf [file d3dt04110g1.pdf]

**Regulating the upconversion luminescence properties of Tm<sup>3+</sup>/Yb<sup>3+</sup>-codoped ZrScW<sub>2</sub>PO<sub>12</sub> microparticles with negative thermal expansion effect through thermal stimulation for optical thermometry**

**Xiaoqing Lai<sup>a</sup>, Przemysław Woźny<sup>b</sup>, Marcin Runowski<sup>b\*</sup>, Laihui Luo<sup>a</sup>, Peng Du<sup>a\*</sup>**

*<sup>a</sup>Department of Microelectronic Science and Engineering, School of Physical Science and Technology, Ningbo*

*University, 315211 Ningbo, Zhejiang, China*

*<sup>b</sup>Adam Mickiewicz University, Faculty of Chemistry, Uniwersytetu Poznańskiego 8, 61-614 Poznań, Poland*

**Corresponding authors:**

**E-mail:** runowski@amu.edu.pl (M. Runowski); dupeng@nbn.edu.cn, dp2007good@sina.com (P. Du)

**Calculation of CCT values of ZrScW<sub>2</sub>PO<sub>12</sub>:Tm<sup>3+</sup>/xYb<sup>3+</sup> microparticles**

The correlated color temperature (CCT) values of final products as a function of doping content were investigated through applying the following expressions:<sup>S1</sup>

$$CCT = -437n^3 + 3601n^2 - 6846n + 5514.31 \quad (1)$$

$$n = (x - x_e)/(y - y_e) \quad (2)$$

where  $(x_e, y_e) = (0.3320, 0.1858)$  and  $(x, y)$  refers to the color coordinate of synthesized microparticles. With the aid of these functions, the CCT values of studied samples were calculated, as listed in Table S2 and S3.

**References**

S1. P. Du, L. Luo, W. Cheng, *J. Am. Ceram. Soc.* 2020, **103**, 1149-1155.

**Table S1** Color coordinates of  $\text{ZrScW}_2\text{PO}_{12}:\text{Tm}^{3+}/x\text{Yb}^{3+}$  microparticles as a function of  $\text{Yb}^{3+}$  content.

| Compounds                                                        | Color coordinate |       |
|------------------------------------------------------------------|------------------|-------|
|                                                                  | $x$              | $y$   |
| $\text{ZrScW}_2\text{PO}_{12}:\text{Tm}^{3+}/0.03\text{Yb}^{3+}$ | 0.185            | 0.124 |
| $\text{ZrScW}_2\text{PO}_{12}:\text{Tm}^{3+}/0.05\text{Yb}^{3+}$ | 0.187            | 0.125 |
| $\text{ZrScW}_2\text{PO}_{12}:\text{Tm}^{3+}/0.07\text{Yb}^{3+}$ | 0.186            | 0.124 |
| $\text{ZrScW}_2\text{PO}_{12}:\text{Tm}^{3+}/0.09\text{Yb}^{3+}$ | 0.186            | 0.123 |
| $\text{ZrScW}_2\text{PO}_{12}:\text{Tm}^{3+}/0.11\text{Yb}^{3+}$ | 0.185            | 0.123 |
| $\text{ZrScW}_2\text{PO}_{12}:\text{Tm}^{3+}/0.13\text{Yb}^{3+}$ | 0.185            | 0.123 |

**Table S2** Temperature dependent color coordinates and CCT of  $\text{ZrScW}_2\text{PO}_{12}:\text{Tm}^{3+}/0.11\text{Yb}^{3+}$  microparticles.

| Temperature | CCT       | CIE coordinates |          |
|-------------|-----------|-----------------|----------|
|             |           | <i>x</i>        | <i>y</i> |
| 303 K       | 3099.2 K  | 0.194           | 0.122    |
| 323 K       | 3059.9 K  | 0.195           | 0.122    |
| 343 K       | 2974.9 K  | 0.195           | 0.121    |
| 363 K       | 2974.9 K  | 0.195           | 0.121    |
| 383 K       | 2858.3 K  | 0.196           | 0.120    |
| 403 K       | 2858.3 K  | 0.196           | 0.120    |
| 423 K       | 2821.6 K  | 0.197           | 0.120    |
| 443 K       | 2749.7 K  | 0.199           | 0.120    |
| 463 K       | 2749.7 K  | 0.199           | 0.120    |
| 483 K       | 2714.3 K  | 0.200           | 0.120    |
| 503 K       | 2714.3. K | 0.202           | 0.121    |
| 523 K       | 2677.8 K  | 0.205           | 0.122    |
| 543 K       | 2642.4 K  | 0.208           | 0.123    |
| 563 K       | 2532.2 K  | 0.215           | 0.125    |
| 583 K       | 2391.2 K  | 0.221           | 0.126    |
| 603 K       | 2376.2 K  | 0.227           | 0.129    |
| 623 K       | 2196.7 K  | 0.236           | 0.131    |

**Table S3** Temperature dependent color coordinates and CCT values of  $\text{ZrScW}_2\text{PO}_{12}:\text{Tm}^{3+}/0.05\text{Yb}^{3+}$  microparticles.

| Temperature | CCT      | CIE coordinates |          |
|-------------|----------|-----------------|----------|
|             |          | <i>x</i>        | <i>y</i> |
| 303 K       | 3534.3 K | 0.193           | 0.126    |
| 323 K       | 3428.2 K | 0.193           | 0.125    |
| 343 K       | 3415.2 K | 0.191           | 0.124    |
| 363 K       | 3189.1 K | 0.194           | 0.123    |
| 383 K       | 3099.2 K | 0.194           | 0.122    |
| 403 K       | 3099.2 K | 0.194           | 0.122    |
| 423 K       | 3018.9 K | 0.196           | 0.122    |
| 443 K       | 3812.4 K | 0.192           | 0.128    |
| 463 K       | 3018.9 K | 0.196           | 0.122    |
| 483 K       | 2940.3 K | 0.198           | 0.122    |
| 503 K       | 2984.1 K | 0.199           | 0.123    |
| 523 K       | 2901.6 K | 0.199           | 0.122    |
| 543 K       | 2871.6 K | 0.206           | 0.125    |
| 563 K       | 2797.4 K | 0.214           | 0.128    |
| 583 K       | 2758.6 K | 0.219           | 0.130    |
| 603 K       | 275.3 K  | 0.223           | 0.131    |
| 623 K       | 2542.5 K | 0.234           | 0.135    |

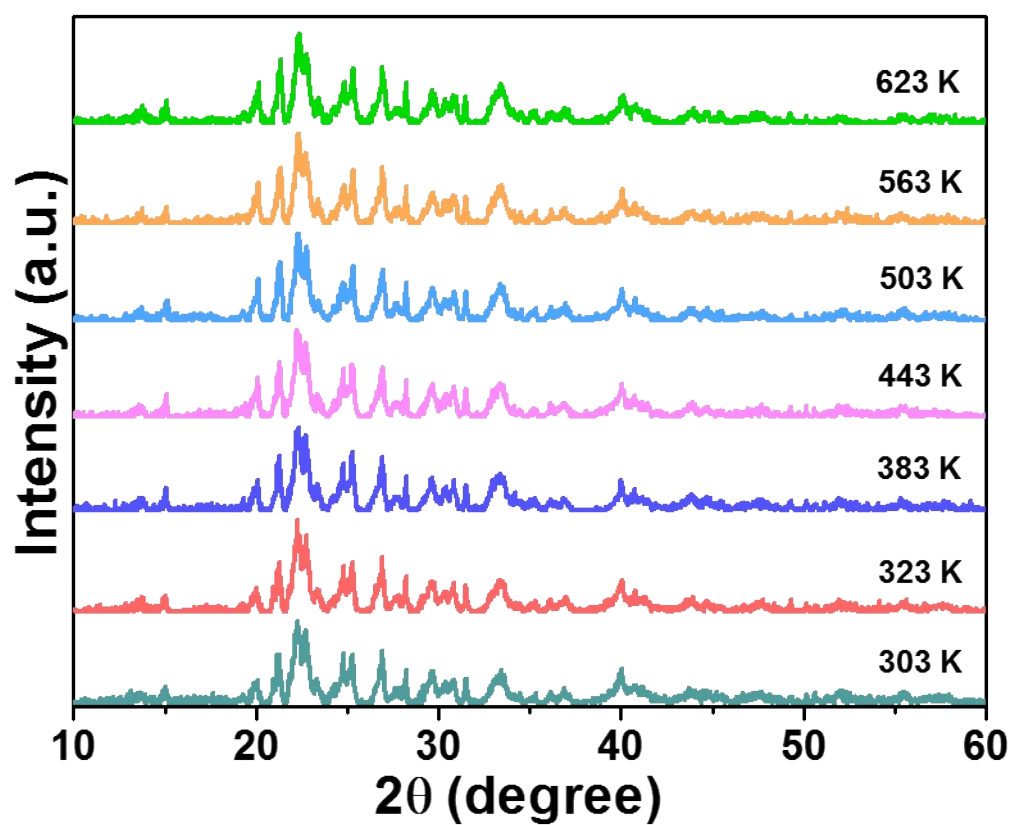

**Figure S1.** Temperature dependent XRD patterns of the ZrScW<sub>2</sub>PO<sub>12</sub>:Tm<sup>3+</sup>/0.11Yb<sup>3+</sup> microparticles.

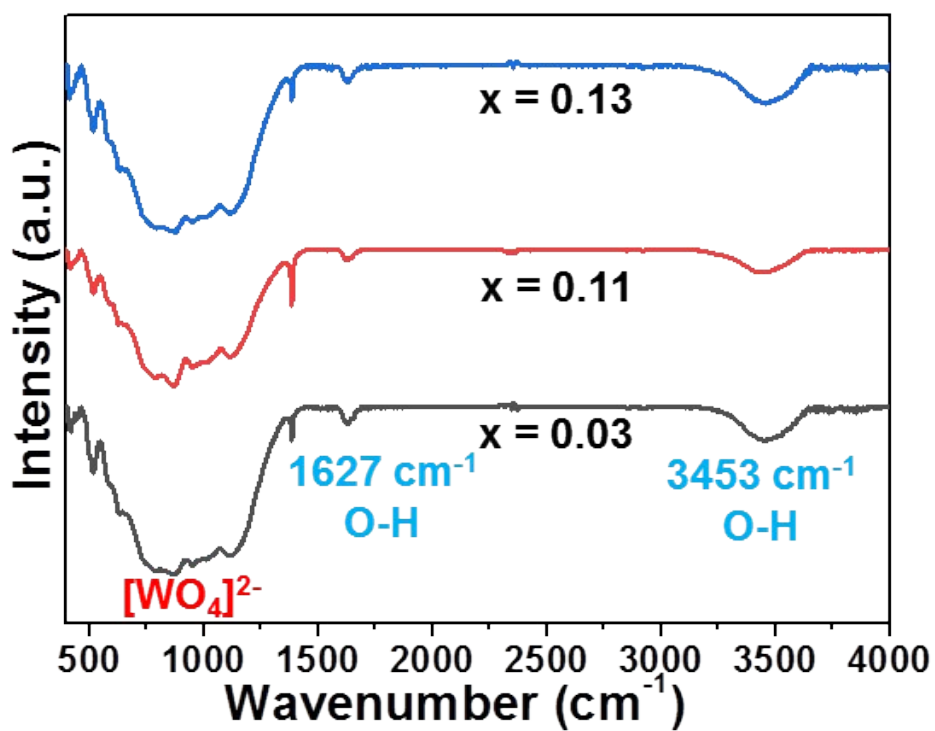

**Figure S2.** FT-IR spectra of ZrScW<sub>2</sub>PO<sub>12</sub>:Tm<sup>3+</sup>/xYb<sup>3+</sup> microparticles with the doping content of 3, 11 and 13 mol%.

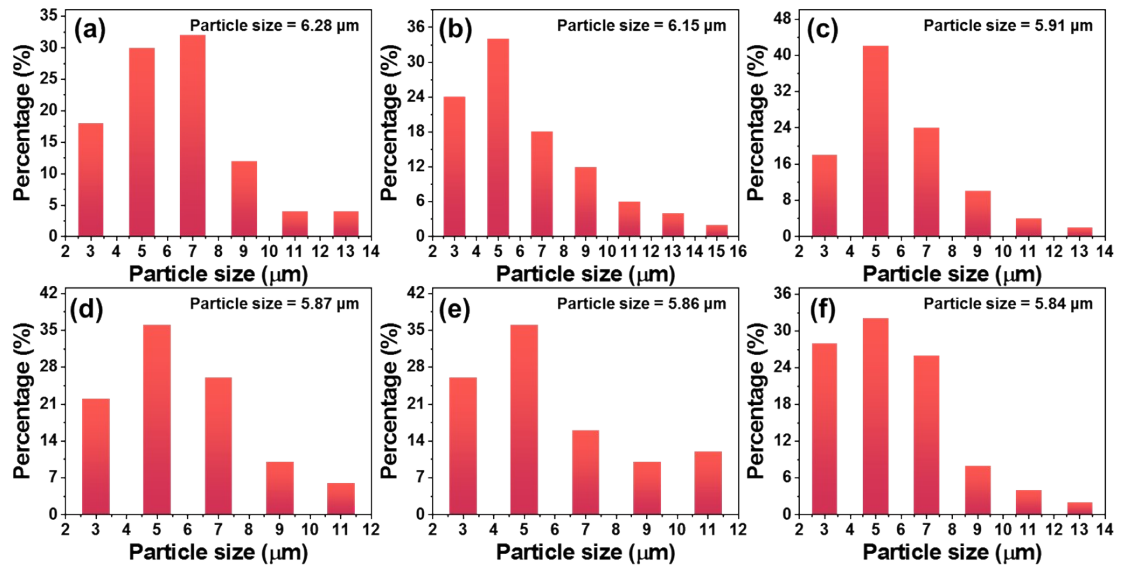

**Figure S3.** Particle size distributions of the  $\text{ZrScW}_2\text{PO}_{12}:\text{Tm}^{3+}/x\text{Yb}^{3+}$  microparticles doped with  $\text{Yb}^{3+}$  content of (a)  $x = 0.03$ , (b)  $x = 0.05$ , (c)  $x = 0.07$ , (d)  $x = 0.09$ , (e)  $x = 0.11$  and (f)  $x = 0.13$ .

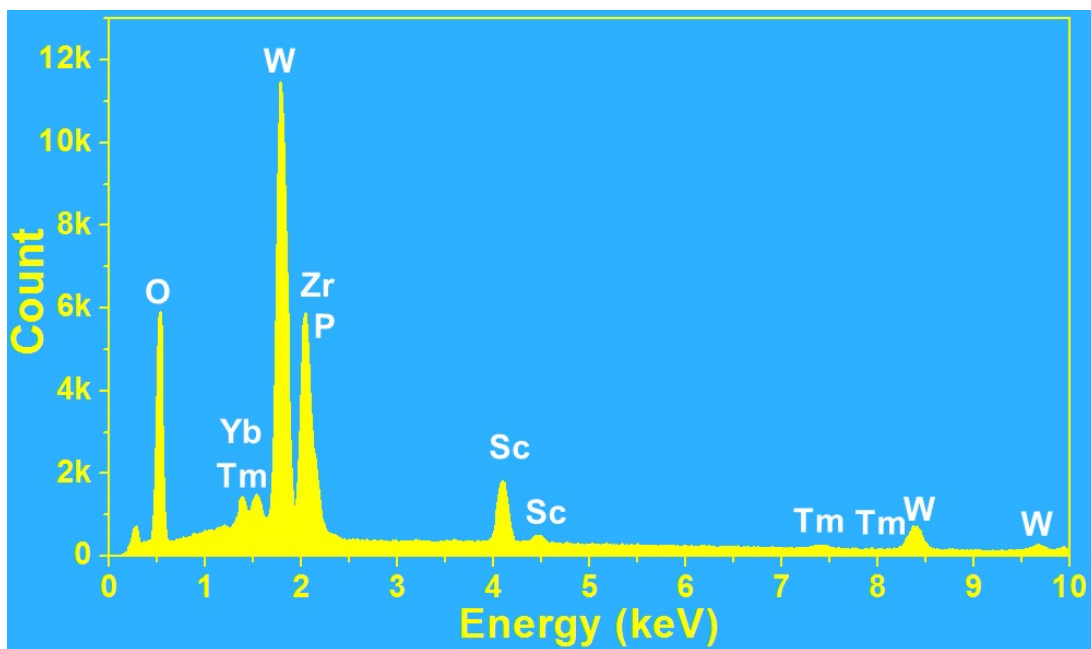

**Figure S4.** EDS spectrum of ZrScW<sub>2</sub>PO<sub>12</sub>:Tm<sup>3+</sup>/0.11Yb<sup>3+</sup> microparticles.



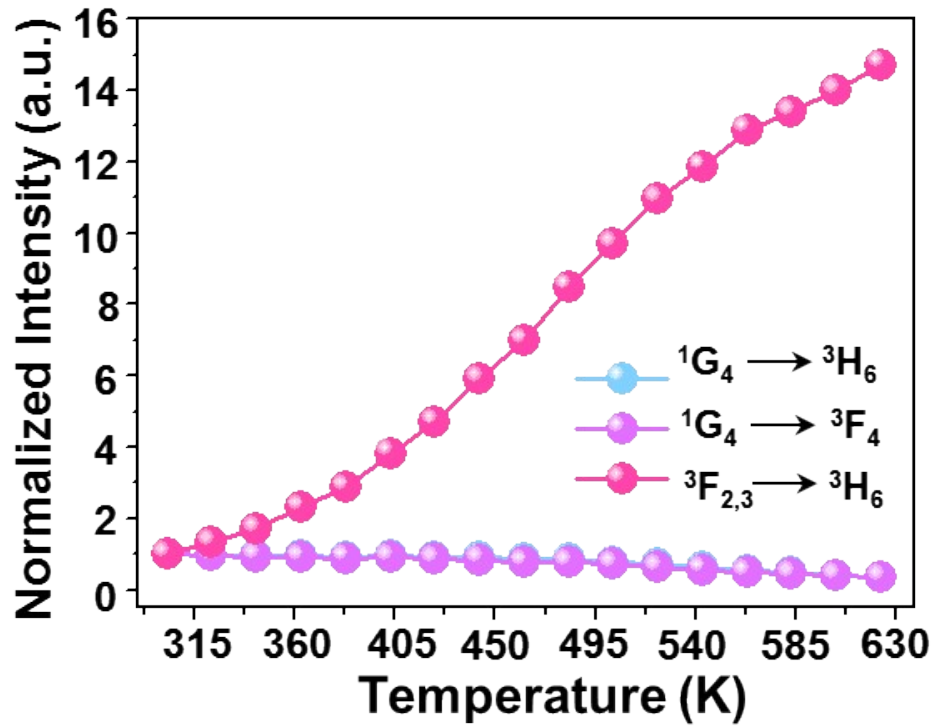

**Figure S5.** Normalized UC emission intensities of  $ZrScW_2PO_{12}:Tm^{3+}/0.11Yb^{3+}$  microparticles as a function of temperature.

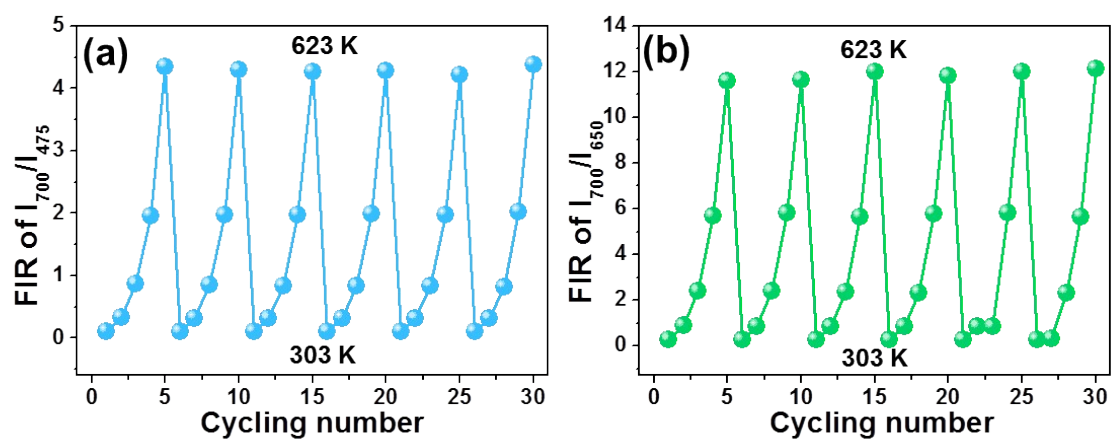

**Figure S6** Temperature-dependent FIR values of (a)  $I_{700}/I_{475}$  and (b)  $I_{700}/I_{650}$  combinations with six cycles of heating and cooling between 303 and 623 K.

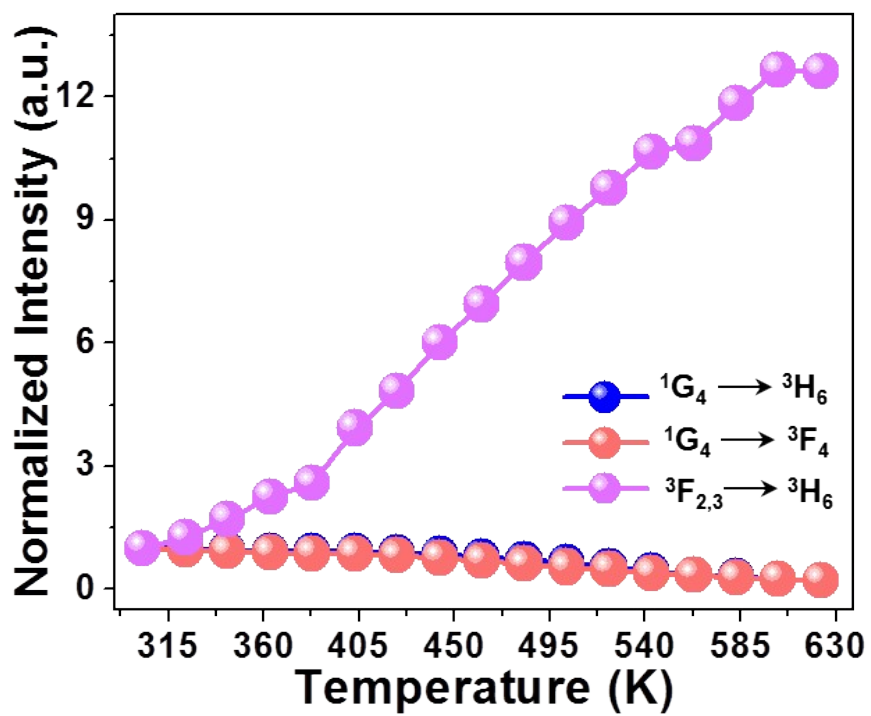

**Figure S7.** Normalized UC emission intensities of  $ZrScW_2PO_{12}:Tm^{3+}/0.05Yb^{3+}$  microparticles as a function of temperature.

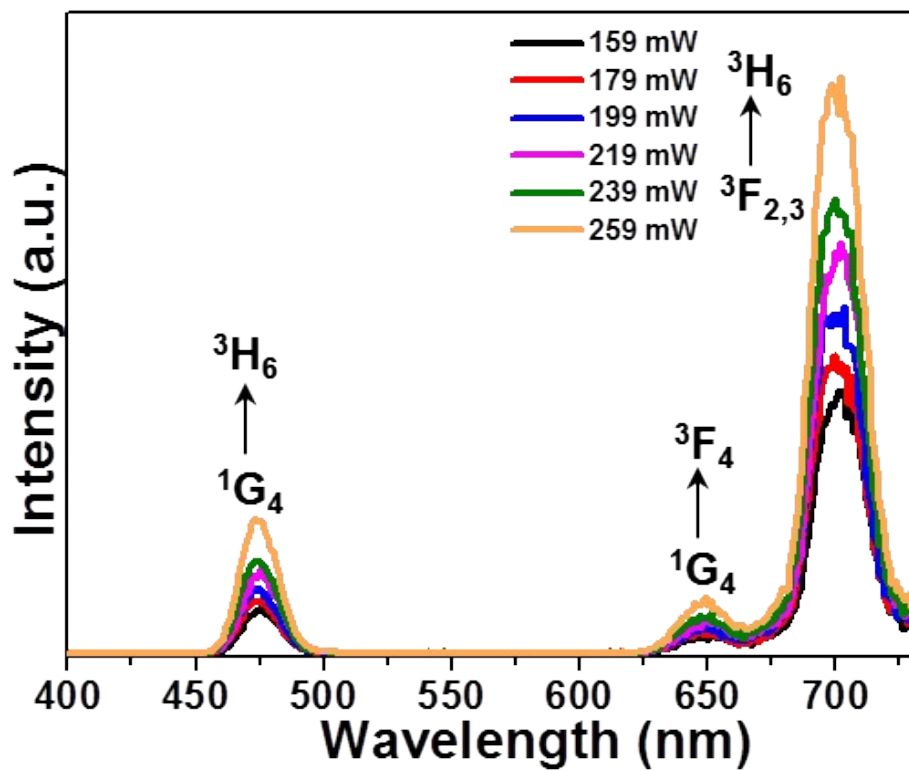

**Figure S8.** Laser pump power dependent UC emission spectra of  $\text{ZrScW}_2\text{PO}_{12}:\text{Tm}^{3+}/0.05\text{Yb}^{3+}$  microparticles recorded at 623 K.
